# Supplementary material for: The inhibitor protein IF1 from mammalian mitochondria inhibits ATP hydrolysis but not ATP synthesis by the ATP synthase complex
Source: PubMed Central journal article supplement (PMC10906535; doi:10.1016/j.jbc.2024.105690), 2024-01-26
Supplement: mmc1.pdf [file mmc1.pdf]

Supporting Information for

**The inhibitor protein IF<sub>1</sub> from mammalian mitochondria inhibits  
ATP hydrolysis but not ATP synthesis by the ATP synthase  
complex**

**Joe Carroll, Ian N. Watt, Charlotte Wright, Shujing Ding, Ian M. Fearnley  
and John E. Walker**

*The Medical Research Council Mitochondrial Biology Unit, University of Cambridge,  
Cambridge Biomedical Campus, Hills Road, Cambridge CB2 0XY, United Kingdom*

Corresponding author: John E. Walker

Email: [walker@mrc-mbu.cam.ac.uk](mailto:walker@mrc-mbu.cam.ac.uk)

Supporting information included:

Figures S1-S8

Tables S1-S6

A

|        |                                                                          |     |
|--------|--------------------------------------------------------------------------|-----|
| Bovine | QKTGTAEVSSILEERILGADTSVDLEETGRVLSIGDGIARVHGLRNVQAEEMVEFSSGLK             | 60  |
| Human  | QKTGTAEVSSILEERILGADTSVDLEETGRVLSIGDGIARVHGLRNVQAEEMVEFSSGLK<br>*****    | 60  |
| Bovine | GMSLNLPEPDNVGVVVFVFNKDLIKEGDIVKRTGAIVDVVPVGEELLGRVVDALGNAIDGKGP          | 120 |
| Human  | GMSLNLPEPDNVGVVVFVFNKDLIKEGDIVKRTGAIVDVVPVGEELLGRVVDALGNAIDGKGP<br>***** | 120 |
| Bovine | IGSKARRRVGLKAPGIIPRISVREPMQTGIKAVDSLVPPIGRGQRELIIGDRQTGKTSIAI            | 180 |
| Human  | IGSKTRRRVGLKAPGIIPRISVREPMQTGIKAVDSLVPPIGRGQRELIIGDRQTGKTSIAI<br>*****   | 180 |
| Bovine | DTIINQKRFNDGTDEKKKLYCIYVAIGQKRSTVAQLVKRLTDADAMKYTIIVVSATASDAA            | 240 |
| Human  | DTIINQKRFNDGSDKKKLYCIYVAIGQKRSTVAQLVKRLTDADAMKYTIIVVSATASDAA<br>*****    | 240 |
| Bovine | PLQYLAPYSGCSMGGEYFRDNGKHALIIYDDLKQAVAYRQMSLLLRPPGREAYPGDVFY              | 300 |
| Human  | PLQYLAPYSGCSMGGEYFRDNGKHALIIYDDLKQAVAYRQMSLLLRPPGREAYPGDVFY<br>*****     | 300 |
| Bovine | LHSRLLERAAMNDAFGGSLTALPVIETQAGDVSAYIPTNVISITDGGIFLETELFYKG               | 360 |
| Human  | LHSRLLERAAMNDAFGGSLTALPVIETQAGDVSAYIPTNVISITDGGIFLETELFYKG<br>*****      | 360 |
| Bovine | IRPAINVGLSVSRVGSAAQTRAMKQVAGTMKLELAQYREVAFAQFGSDLAATQQLLSR               | 420 |
| Human  | IRPAINVGLSVSRVGSAAQTRAMKQVAGTMKLELAQYREVAFAQFGSDLAATQQLLSR<br>*****      | 420 |
| Bovine | GVRLTELLKQGQYSPMAIEEQVAVIYAGVRGYLDKLEPSKITKFENAFLSHVVISQHALL             | 480 |
| Human  | GVRLTELLKQGQYSPMAIEEQVAVIYAGVRGYLDKLEPSKITKFENAFLSHVVISQHALL<br>*****    | 480 |
| Bovine | SKIRTDGKISEESDAKLKEIVTNFLAGFEA                                           | 510 |
| Human  | GTIRADGKISEQSDAKLKEIVTNFLAGFEA                                           | 510 |
|        | *****                                                                    |     |

B

|        |                                                                         |     |
|--------|-------------------------------------------------------------------------|-----|
| Bovine | AAQASPSPKAGATTGRIVAVIGAVVDVQFDEGLPPILNALEVQGRETRLVLEVAQHLGES            | 60  |
| Human  | AAQTSPSPKAGAATGRIVAVIGAVVDVQFDEGLPPILNALEVQGRETRLVLEVAQHLGES<br>*****   | 60  |
| Bovine | TVRTIAMDGTEGLVRGQKVLDSGAPIRIPVGPETLGRIMNVIGEPIDERGPIKTKQFAAI            | 120 |
| Human  | TVRTIAMDGTEGLVRGQKVLDSGAPIKIPVGPETLGRIMNVIGEPIDERGPIKTKQFAPI<br>*****   | 120 |
| Bovine | HAEAPEFVEMSVEQEILVTGIKVVDLLAPYAKGGKIGLFGGAGVGKTVLIMELINNVAKA            | 180 |
| Human  | HAEAPEFVEMSVEQEILVTGIKVVDLLAPYAKGGKIGLFGGAGVGKTVLIMELINNVAKA<br>*****   | 180 |
| Bovine | HGGYSVFAGVGERTREGNDLYHEMIESGVINLKDATSKVALVYQGMNEPPGARARVALTG            | 240 |
| Human  | HGGYSVFAGVGERTREGNDLYHEMIESGVINLKDATSKVALVYQGMNEPPGARARVALTG<br>*****   | 240 |
| Bovine | LTVAEYFRDQEGQDVLFFIDNIFRFTQAGSEVSALLGRIPSAVGYQPTLATDMGTMQERI            | 300 |
| Human  | LTVAEYFRDQEGQDVLFFIDNIFRFTQAGSEVSALLGRIPSAVGYQPTLATDMGTMQERI<br>*****   | 300 |
| Bovine | TTTTKGSITSVQAIYVPADDLTPAPATTF AHL DATTVL SRAIAELGIYPAVDPLDSTSR          | 360 |
| Human  | TTTTKGSITSVQAIYVPADDLTPAPATTF AHL DATTVL SRAIAELGIYPAVDPLDSTSR<br>***** | 360 |
| Bovine | IMDPNIVGSEHYDVARGVQKILQDYKSLQDIIAILGMDELSEEDKLTVSRARKIQRFLSQ            | 420 |
| Human  | IMDPNIVGSEHYDVARGVQKILQDYKSLQDIIAILGMDELSEEDKLTVSRARKIQRFLSQ<br>*****   | 420 |
| Bovine | PFQVAEVFTGHLGKLVPLKETIKGFQQILAGEYDHLPEQAFYMGPIEEAVAKADKLAEE             | 480 |
| Human  | PFQVAEVFTGHMGKLVPLKETIKGFQQILAGEYDHLPEQAFYMGPIEEAVAKADKLAEE<br>*****    | 480 |
| Bovine | HS-                                                                     | 482 |
| Human  | HSS                                                                     | 483 |
|        | **                                                                      |     |

C

|        |                                                              |     |
|--------|--------------------------------------------------------------|-----|
| Bovine | ATLKDITRRLKSIKNIQKITKSMKMVAAAKYARAERELKPARVYGVGSLALYEKADIKTP | 60  |
| Human  | ATLKDITRRLKSIKNIQKITKSMKMVAAAKYARAERELKPARIYGLGSLALYEKADIKGP | 60  |
|        | *****.*****.*****.*.*:*****.*                                |     |
| Bovine | EDKKKHLIIGVSSDRGLCGAIHSSVAKQMKSEANLAAAGKEVKIIGVGDKIRSLHRTH   | 120 |
| Human  | EDKKKHLIIGVSSDRGLCGAIHSSIAKQMKSEVATLTAAGKEVMLVGIGDKIRGILYRTH | 120 |
|        | *****.*****.*****.*.*:*****.*                                |     |
| Bovine | SDQFLVTFKEVGRPPPTFGDASVIALELLNSGYEFDEGSIIFNFRSVISYKTEEKPIFS  | 180 |
| Human  | SDQFLVAFKEVGRKPPTFGDASVIALELLNSGYEFDEGSIIFNFRSVISYKTEEKPIFS  | 180 |
|        | *****.*****.*****.*****.*****.*****.*****.*****              |     |
| Bovine | LDTISSAESMSIYDDIDADVLRNYQEYSLANIIYYSLKESTTSEQSARMTAMDNASKNAS | 240 |
| Human  | LNTVASADSMSIYDDIDADVLRNYQEYSLANIIYYSLKESTTSEQSARMTAMDNASKNAS | 240 |
|        | *.*.:**.*:*****.*****.*****.*****.*****.*****.*****          |     |
| Bovine | EMIDKLTTLFNRTRQAVITKELIEIISGAAALD                            | 273 |
| Human  | EMIDKLTTLFNRTRQAVITKELIEIISGAAALD                            | 273 |
|        | *****.*****.*****.*****.*****.*****.*****.*****              |     |

**Fig. S1. Comparison of the sequences of the  $\alpha$ -,  $\beta$ - and  $\gamma$ -subunits of bovine and human ATP synthase.** The mature subunits are numbered from residue 1 to their C-termini. Symbols \*, : and . denote identical, strongly conserved and weakly conserved residues respectively. (A)  $\alpha$ -subunits (bovine, sp|P19483; human, sp|P25705) identical in 98.4% residues. (B)  $\beta$ -subunits (bovine, sp|P00829; human, sp|P06576), identical in 98.6% residues. (C)  $\gamma$ -subunits (bovine, sp|P05631; human, sp|P36542), identical in 92.3% residues with a further 6.2% residues highly conserved.

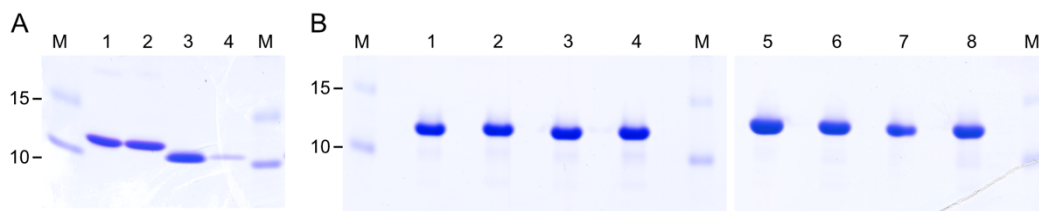

**Fig. S2. Analysis of purified bovine and human IF<sub>1</sub> by SDS-PAGE.** (A) Bovine IF<sub>1</sub>. Lanes 1 and 2, bovine IF<sub>1</sub>(1-84) with the mutations Y33W and Y33W-H49K, respectively; lanes 3 and 4, bovine IF<sub>1</sub>(1-62) with the mutations Y33W and Y33W-H49K, respectively. (B) Human IF<sub>1</sub> (1-81). Lane 1, wild type (residues 1-81); 2-8, forms containing, respectively, the following mutations: 2, H49K; 3, Y33W; 4, Y33W-H49K; 5, S14D-Y33W; 6, S14D-Y33W-H49K; 7, S14E-Y33W; 8, S14E-Y33W-H49K. M, molecular weight markers (kDa) are indicated.

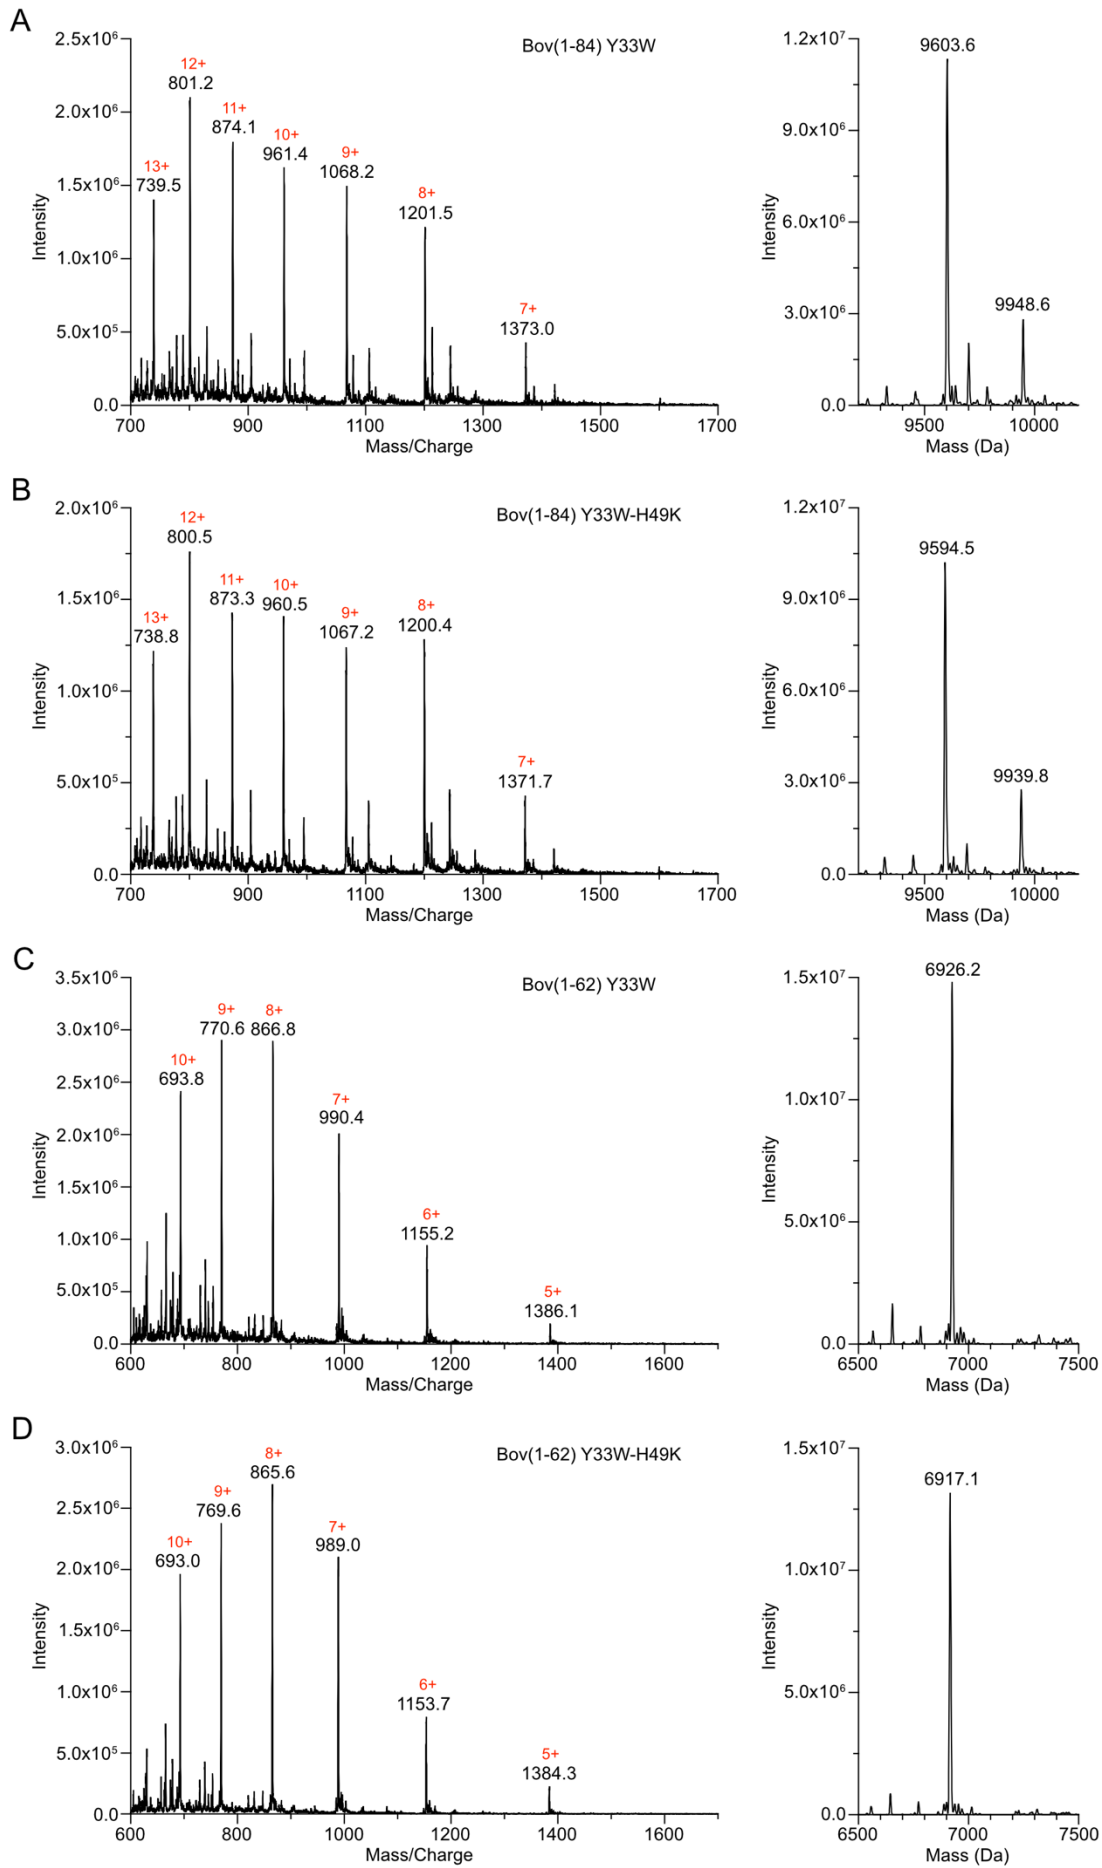

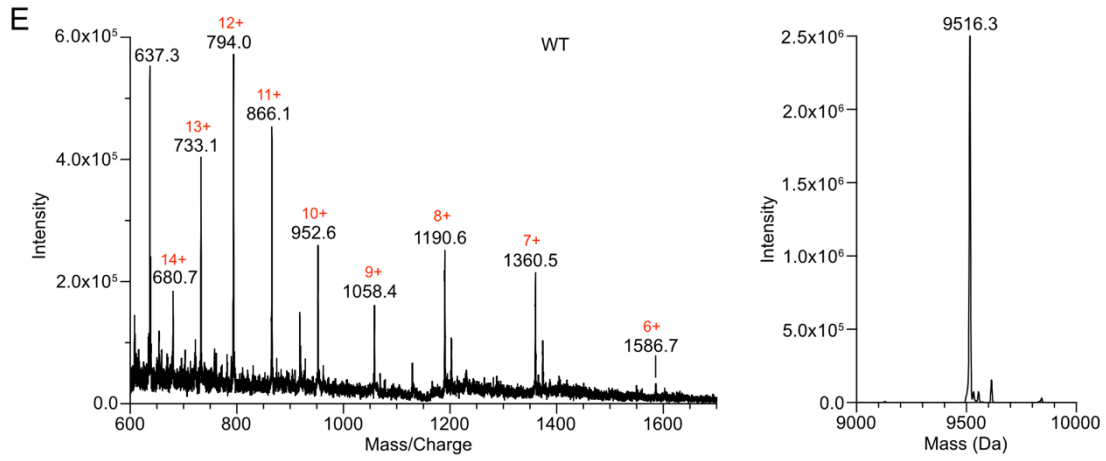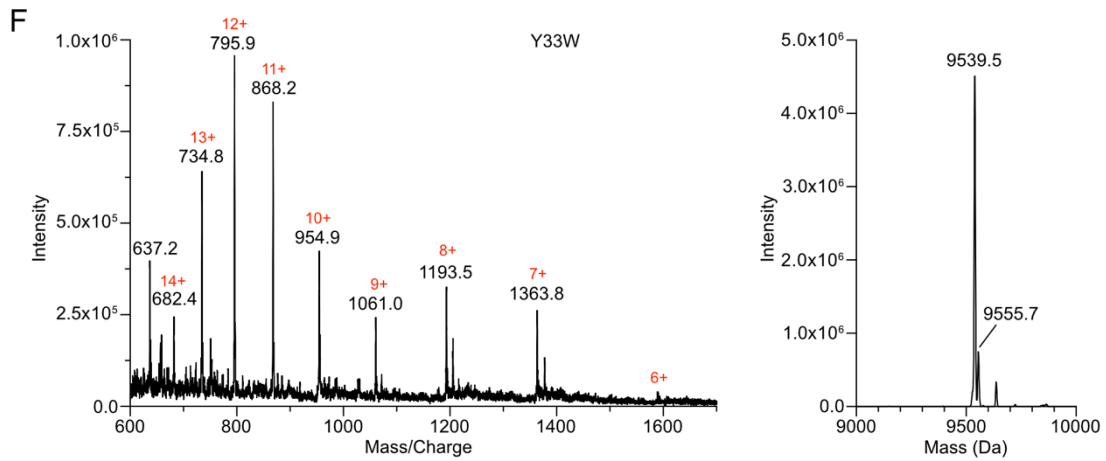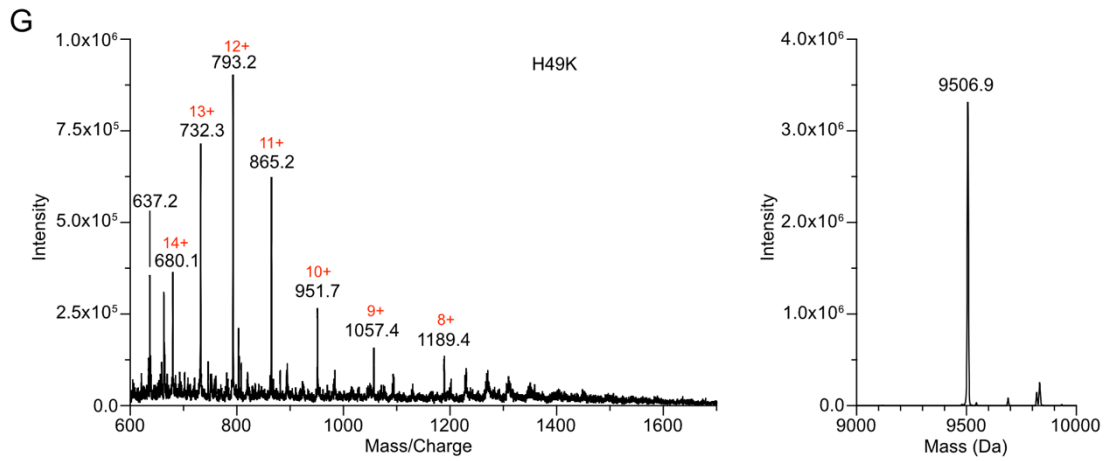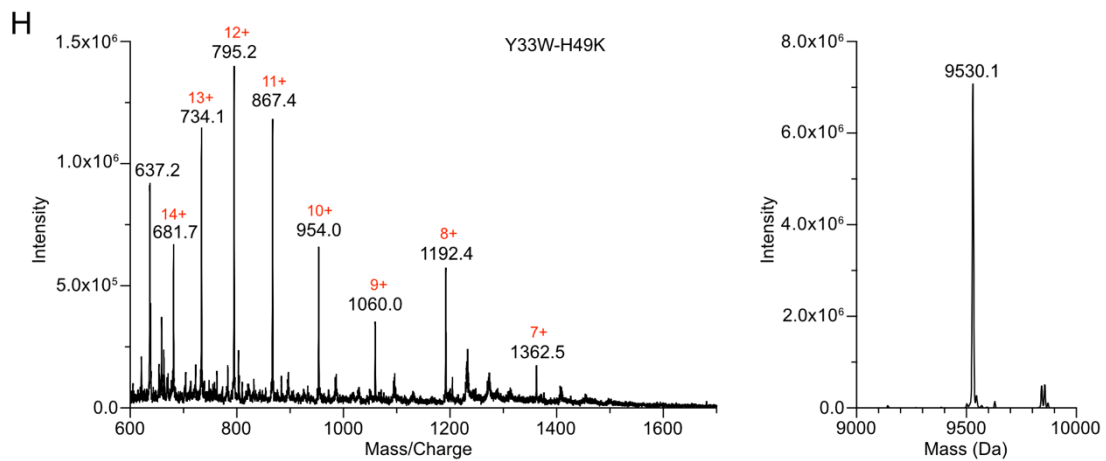

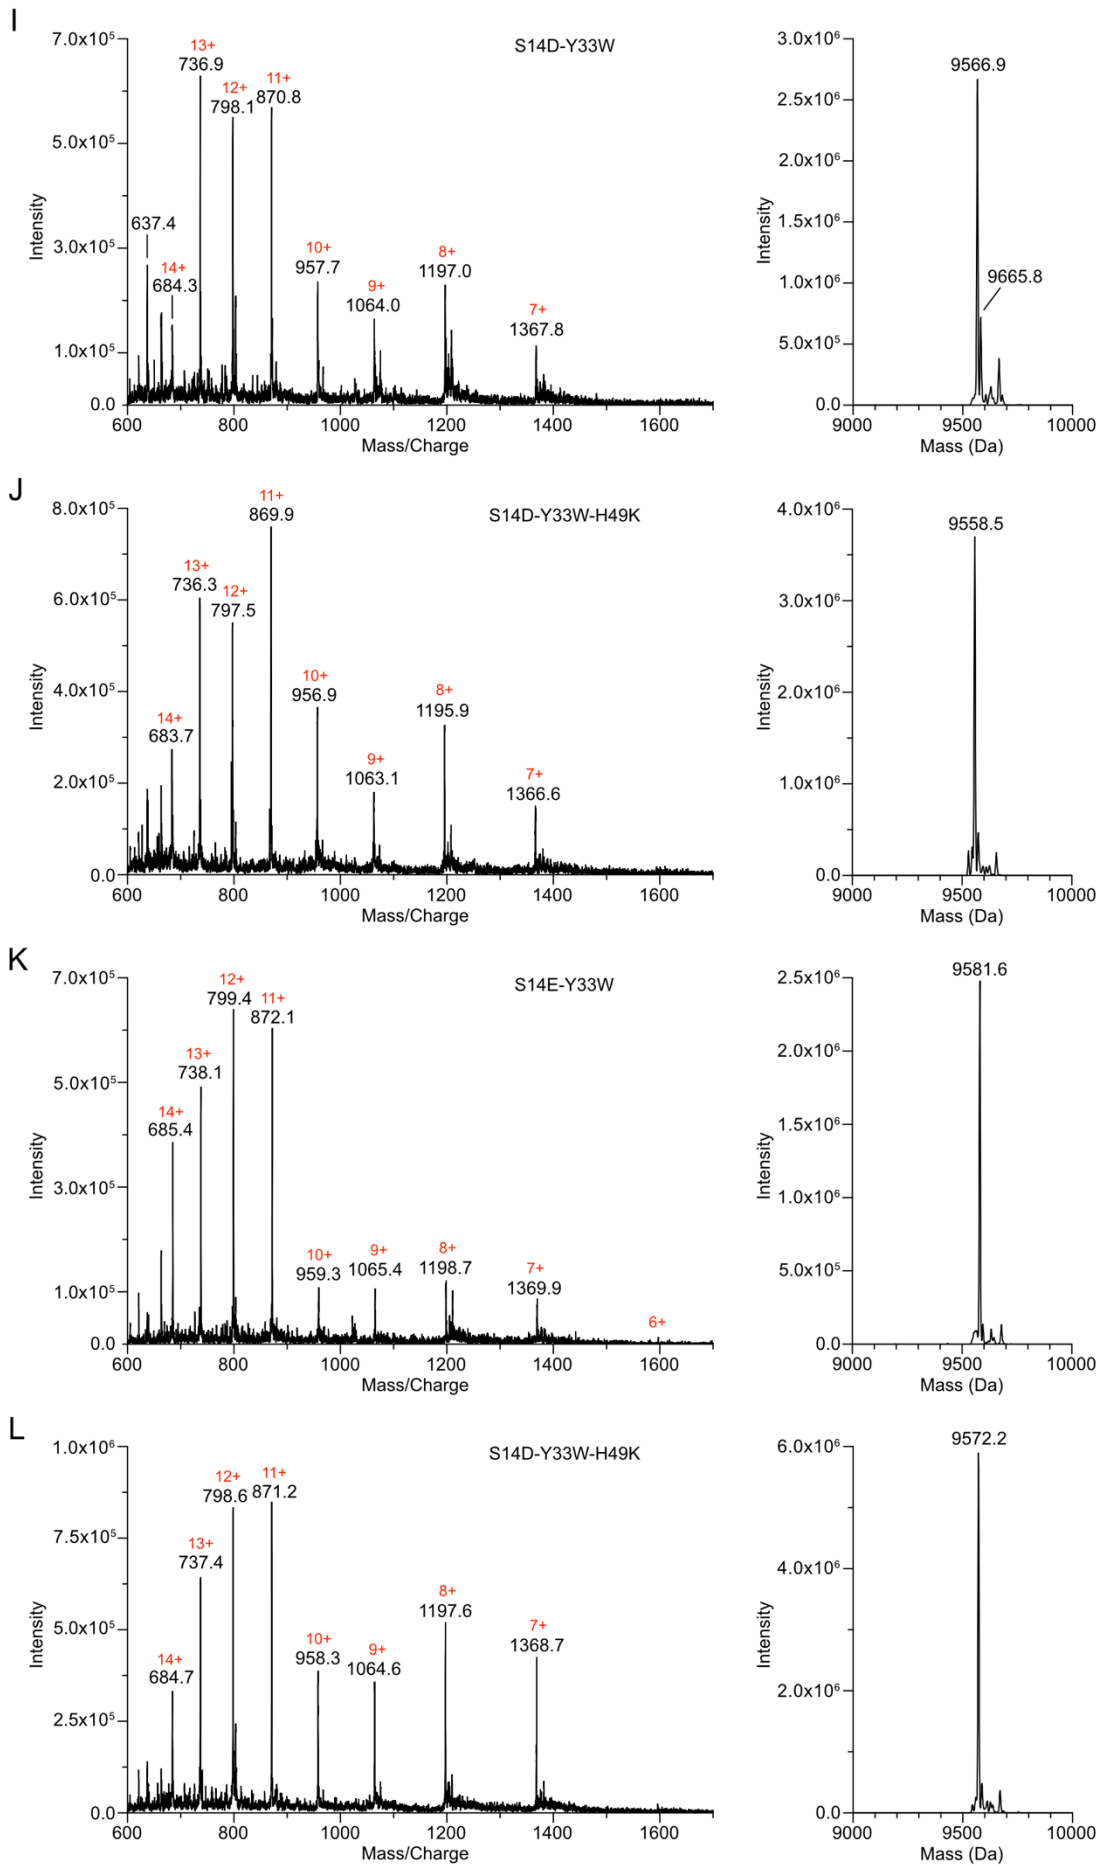

**Fig. S3. ESI-MS spectra of recombinant bovine and human IF<sub>1</sub> proteins.** Each row shows the raw spectra and the transformations of these data onto a molecular mass scale. (A) BovIF<sub>1</sub>(1-84)-Y33W; (B) BovIF<sub>1</sub>(1-84)-Y33W-H49K; (C) BovIF<sub>1</sub>(1-62)-Y33W; (D) BovIF<sub>1</sub>(1-62)-Y33W-H49K; (E) HumIF<sub>1</sub>(1-81)-wild-type; (F) HumIF<sub>1</sub>(1-81)-Y33W; (G) HumIF<sub>1</sub>(1-81)-H49K; (H) HumIF<sub>1</sub>(1-81)-Y33W-H49K; (I) HumIF<sub>1</sub>(1-81)-S14D-Y33W; (J) HumIF<sub>1</sub>(1-81)-S14D-Y33W-H49K; (K) HumIF<sub>1</sub>(1-81)-S14E-Y33W; (L) HumIF<sub>1</sub>(1-81)-S14E-Y33W-H49K.

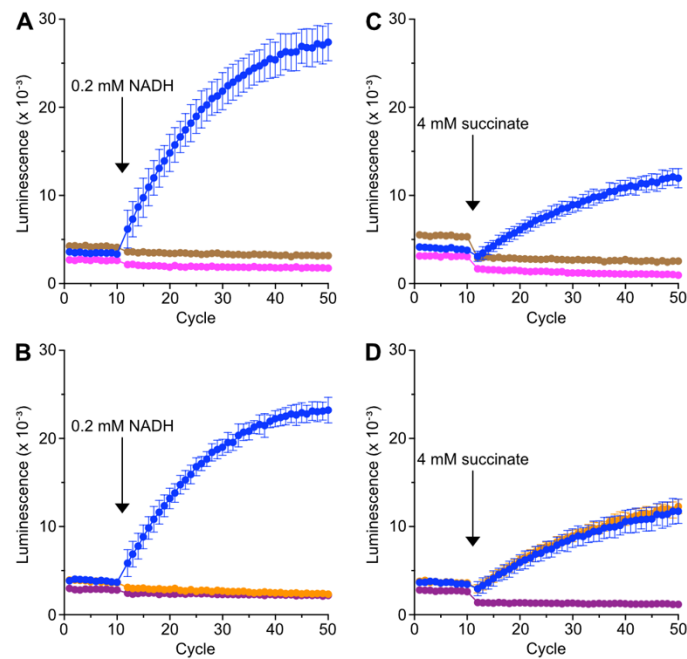

**Fig. S4. Inhibition of ATP synthesis in bovine SMPs by respiratory inhibitors.** ATP synthesis coupled to oxidation of (A and B), NADH (0.2 mM) or (C and D), succinate (4 mM). ATP synthesis in the presence of (●), DMSO vehicle only; (●), 1  $\mu$ M oligomycin; (●), 0.5  $\mu$ M FCCP; (●), 1  $\mu$ M rotenone; (●), 1  $\mu$ M antimycin A. Background luminescence levels were established for 10 measurement cycles before addition of substrate and generation of ATP. Measurements of luminescence were made in quadruplicate and average values  $\pm$  SD are shown.

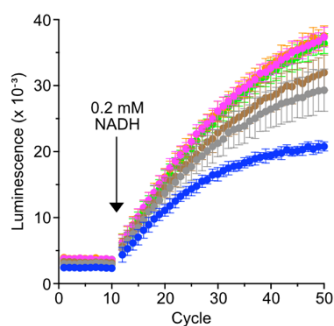

**Fig. S5. Effect of the concentration of BovIF<sub>1</sub>(1-84)-Y33W on the synthetic activity of ATP synthase.** (●), no inhibitor; (●), 1.35 μM, (●), 6.75 μM; (●), 33.8 μM; (●), 67.5 μM; (●), 135 μM. At a concentration of 135 μM inhibitor protein, the molar ratio with respect to the ATP synthase is ca. 11000:1. ATP synthesis was initiated by the addition of NADH, and monitored by a luminescence continuous real-time assay with a luciferase-luciferin reagent. Background luminescence levels were established for 10 measurement cycles. N=4 wells, and data points show the average signal ± SD.



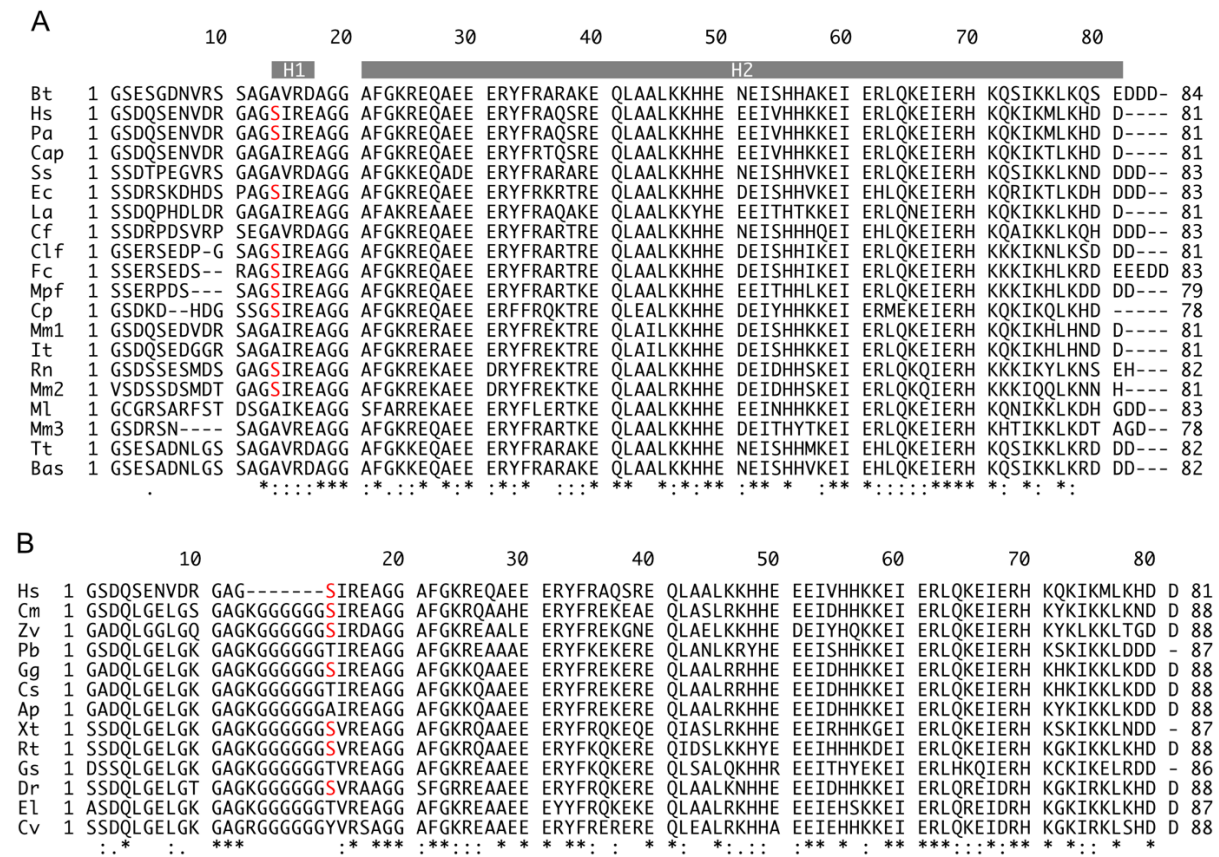

**Fig. S6. Comparison of sequences of IF<sub>1</sub> proteins from various vertebrates.** The N-terminal residues of only the mature bovine and human proteins have been identified experimentally. The mitochondrial import precursors of the inhibitors from other species are assumed to be processed at the same site. Residue Ser-14 in the human protein has been proposed to be phosphorylated reversibly. This residue and conserved serine residues in the same position in other species are shown in red. The symbols \*, : and . denote identical, strongly conserved and weakly conserved residues respectively. (A) Sequences of mammalian IF<sub>1</sub> molecules. The grey bars H1 and H2 denote the positions of  $\alpha$ -helices in the structure of the bovine protein. Bt, *Bos taurus* (cattle, sp|P01096); Hs, *Homo sapiens* (human, sp|Q9UII2); Pa, *Pongo abelii* (Sumatran orangutan, sp|Q5RFJ9); Cap, *Colobus angolensis palliatus* (Angolan colobus, tr|A0A2K5KBI5); Ss, *Sus scrofa* (pig, sp|Q29307); Ec, *Equus caballus* (horse, tr|F6ZXT0); La, *Loxodonta africana* (African bush elephant, tr|G3SWQ8); Cf, *Camelus ferus* (wild Bactrian camel, tr|S9XNE5); Clf, *Canis lupus familiaris* (domestic dog,

tr|E2QYN4); Fc, *Felis catus* (cat, tr|M3WIS8); Mpf, *Mustela putorius furo* (ferret, tr|M3YVR5); Cp, *Cavia porcellus* (guinea pig, tr|A0A286Y431); Mm1, *Marmota monax* (groundhog, tr|A0A5E4AD98); It, *Ictidomys tridecemlineatus* (thirteen-lined ground squirrel, tr|I3N8E6); Rn, *Rattus norvegicus* (brown rat, sp|Q03344); Mm2, *Mus musculus* (mouse, sp|O35143); Ml, *Myotis lucifugus* (little brown bat, tr|G1NSN7); Mm3, *Molossus molossus* (Pallas's mastiff bat, tr|A0A7J8F6B1); Tt, *Tursiops truncatus* (common bottlenose dolphin, tr|A0A2U3V0R3); Bas, *Balaenoptera acutorostrata scammoni* (minke whale, tr|A0A383Z6R7). (B) The sequence of human IF<sub>1</sub> compared with examples of orthologs from reptiles, birds, amphibians and fish. Hs, *Homo sapiens* (human, sp|Q9UII2); Cm, *Chelonia mydas* (green sea turtle, ncbi|XP\_037737775); Zv, *Zootoca vivipara* (European common lizard, ncbi|XP\_034976781); Pb, *Python bivittatus* (Burmese python, ncbi|XP\_007434913); Gg, *Gallus gallus* (chicken, ncbi|XP\_015153068); Cs, *Callipepla squamata* (scaled quail, ncbi|OXB61861); Ap, *Anas platyrhynchos* (mallard duck, ncbi|XP\_027299537); Xt, *Xenopus tropicalis* (western clawed frog, sp|F7BK26); Rt, *Rana temporaria* (European common frog, ncbi|XP\_040193223); Gs, *Geotrypetes seraphini* (Gaboon caecilian, ncbi|XP\_033813241); Dr, *Danio rerio* (zebrafish, sp|A3KNL5); El, *Esox lucius* (northern pike, tr|C1BWJ3); Cv, *Cyprinodon variegatus* (sheepshead minnow, tr|A0A3Q2D9N0). Sequences were taken from the Swiss-Prot (sp), TrEMBL (tr) and NCBI (ncbi) databases. The alignments were made with Clustal Omega (1.2.4). In (B) the alignment was adjusted manually post Clustal Omega, placing the gap in the human sequence with the run of Gly residues found in the other proteins.

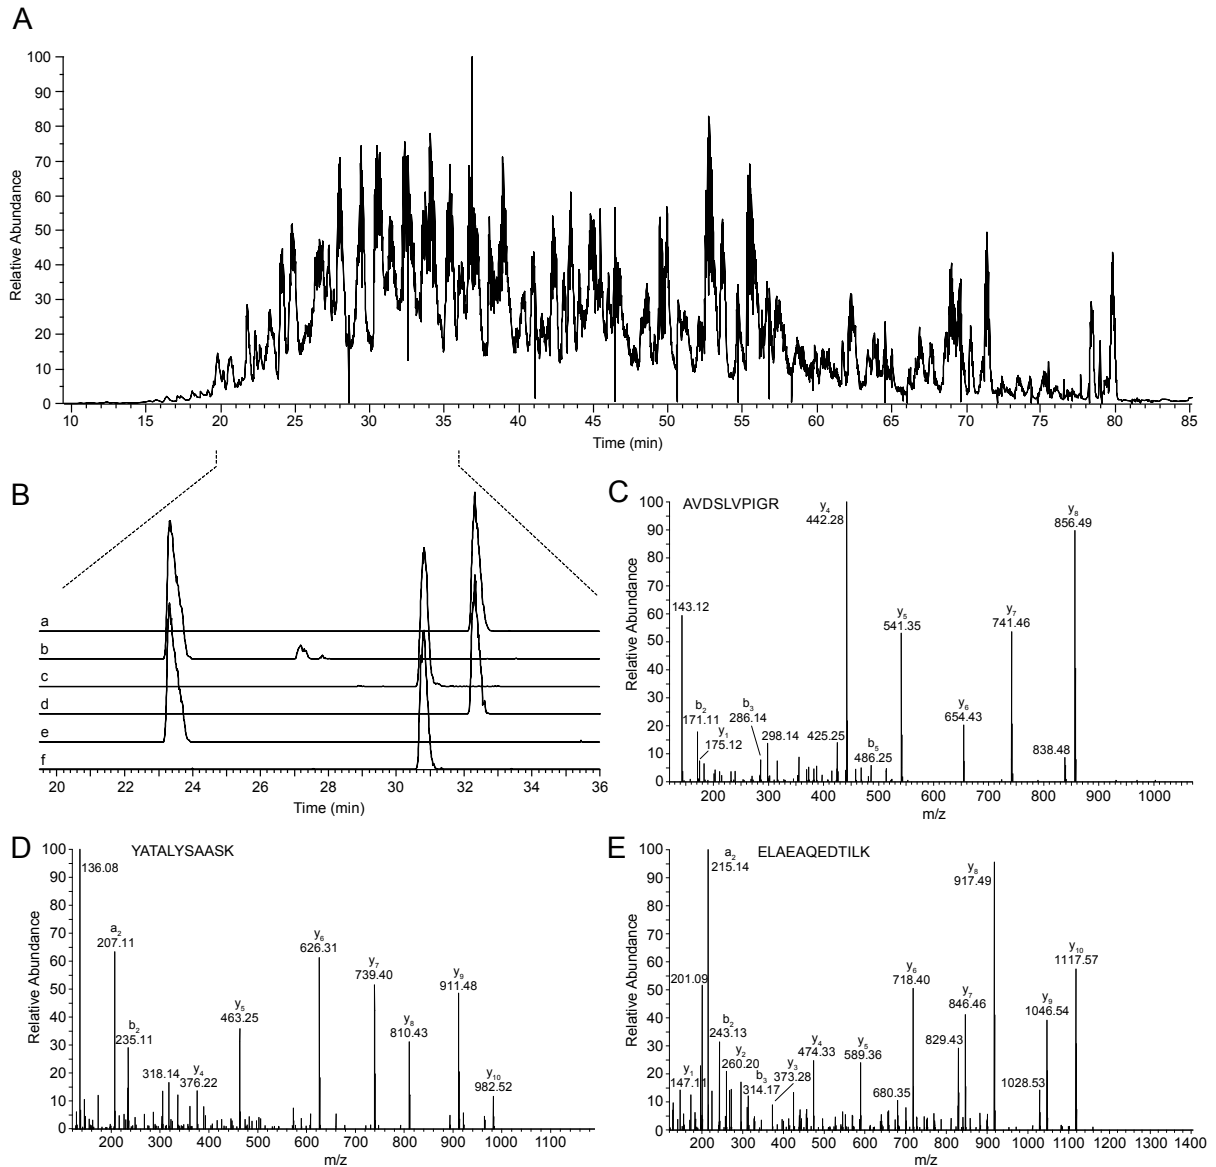

**Fig. S7. The abundance of ATP synthase in bovine submitochondrial particles (SMPs) determined by quantitative mass spectrometry. Examples of:** (A) LC-MSMS total ion current from an analysis of a tryptic digest of SMPs, spiked with heavy labelled subunit specific peptides (see Table S5). (B) Extracted ion chromatograms showing co-eluting peaks for the subunit specific labelled and endogenous peptides (charge state 2<sup>+</sup>) of subunit- $\alpha$  (a and d), OSCP (b and e) and subunit-e (c and f). (C-E) Tandem-MSMS spectra providing identification of the endogenous peptides.

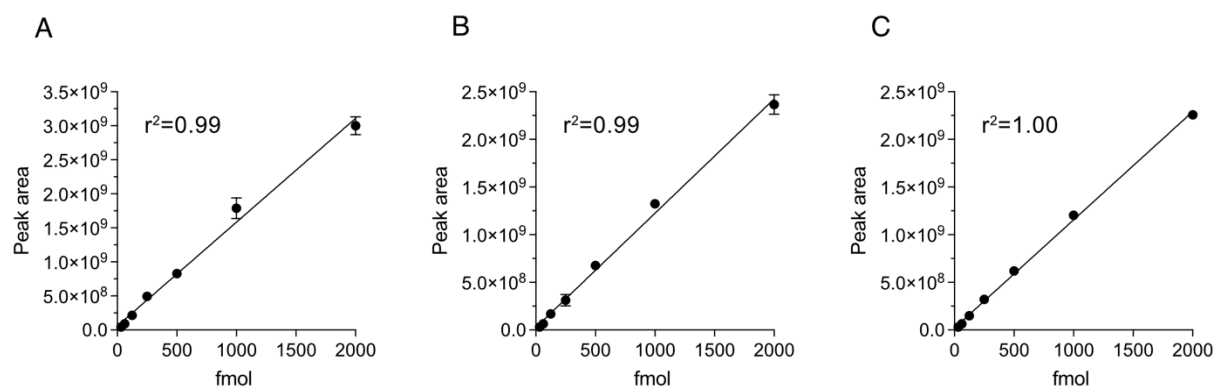

**Fig. S8. Peak areas versus standard peptide concentration.** A serial dilution of a mixture of three heavy labelled reference tryptic peptides (see Table S5) for ATP synthase were analyzed using an Orbitrap QE mass spectrometer (ThermoFisher). (A)  $\alpha$ -subunit, (B) OSCP and (C)  $\alpha$ -subunit-e with charge state  $2^+$  were obtained from the extracted ion chromatograms of the parent ions with Xcalibur (ThermoFisher) and an  $m/z$  tolerance of 5 ppm.  $N=2$ ,  $\pm$  SD.

**Table S1. Residues involved in binding bovine IF<sub>1</sub> to the  $\beta$ -,  $\alpha$ - and  $\gamma$ -subunits of bovine F<sub>1</sub>-ATPase and the identities of the equivalent amino acids in the human orthologs**

| IF <sub>1</sub> |       | $\beta$ -subunit |       | $\alpha$ -subunit |       | $\gamma$ -subunit |       |
|-----------------|-------|------------------|-------|-------------------|-------|-------------------|-------|
| bovine          | human | bovine           | human | bovine            | human | bovine            | human |
| S11             | G11   |                  |       |                   |       | N15               | N15   |
| A12             | A12   |                  |       | E353              | E353  |                   |       |
| G13             | G13   | D386             | D386  |                   |       |                   |       |
| V15             | I15   | D386             | D386  |                   |       |                   |       |
| D17             | E17   | D386             | D386  |                   |       |                   |       |
| F22             | F22   | D386             | D386  |                   |       | I16               | I16   |
|                 |       | I390             | I390  |                   |       |                   |       |
|                 |       | L391             | L391  |                   |       |                   |       |
| R25             | R25   |                  |       |                   |       | E241              | E241  |
| E30             | E30   | R408             | R408  |                   |       |                   |       |
| E31             | E31   | R408             | R408  |                   |       |                   |       |
| Y33             | Y33   | K401             | K401  |                   |       |                   |       |
|                 |       | M393             | M393  |                   |       |                   |       |
|                 |       | D394             | D394  |                   |       |                   |       |
| F34             | F34   | V404             | V404  |                   |       |                   |       |
|                 |       | S405             | S405  |                   |       |                   |       |
|                 |       | R408             | R408  |                   |       |                   |       |
|                 |       | E454             | E454  |                   |       |                   |       |
| R35             | R35   |                  |       | E399              | E399  |                   |       |
| Q41             | Q41   | D450             | D450  |                   |       |                   |       |
| L42             | L42   | P453             | P453  |                   |       |                   |       |
|                 |       | L473             | L473  |                   |       |                   |       |
|                 |       | A474             | A474  |                   |       |                   |       |
|                 |       | H477             | H477  |                   |       |                   |       |
| L45             | L45   | A470             | A470  |                   |       |                   |       |
|                 |       | D471             | D471  |                   |       |                   |       |
|                 |       | A474             | A474  |                   |       |                   |       |

The bovine data are taken from Bason *et al* (2014) (1).

**Table S2. Content of ATP synthase in bovine SMPs**

| Experiment <sup>1</sup> | ATP synthase         |                    | Subunit ratio<br>$\alpha$ : OSCP : e |
|-------------------------|----------------------|--------------------|--------------------------------------|
|                         | nmol/mg SMP $\pm$ SD | mg/mg SMP $\pm$ SD |                                      |
| A                       | 0.49 $\pm$ 0.09      | 0.28 $\pm$ 0.05    | 3.0 : 0.9 : 1.4                      |
| B                       | 0.47 $\pm$ 0.05      | 0.27 $\pm$ 0.03    | 3.0 : 0.9 : 1.1                      |
| Average                 | 0.48                 | 0.28               | 3.0 : 0.9 : 1.2                      |

<sup>1</sup> For experiment A, two samples of the same preparation of extracted SMPs were digested separately with trypsin and each analyzed twice by MS. The ratio is an average of the four calculated values. For experiment B, a single digest was performed, analyzed twice by MS, with the ratio an average of the two calculated values. Data file S27.

**Table S3. Molar ratios of IF<sub>1</sub> and ATPase in various animals and tissues estimated by quantitative Western blotting**

| Molar ratio | Sample                               | Method           | Reference |
|-------------|--------------------------------------|------------------|-----------|
| 2.5:1       | Goat heart mitochondria              | Western blotting | (2)       |
| 4-6:1       | Human heart and brain tissue         | Western blotting | (3)       |
| 0.5-1:1     | Human liver and kidney tissue        | Western blotting | (3)       |
| 4-9:1       | Mouse kidney, brain and colon tissue | Western blotting | (3)       |
| 0-1:1       | Mouse heart and liver tissue         | Western blotting | (3)       |

**Table S4. Molecular masses of bovine and human IF<sub>1</sub> and mutant forms determined by electrospray mass spectrometry**

| Protein                                  | Mass (Da) |          | Mass Difference (Da) |
|------------------------------------------|-----------|----------|----------------------|
|                                          | Expected  | Observed |                      |
| BovIF <sub>1</sub> (1-84)-Y33W           | 9604.5    | 9603.6   | -0.9                 |
| BovIF <sub>1</sub> (1-84)-Y33W-H49K      | 9595.3    | 9594.5   | -0.8                 |
| BovIF <sub>1</sub> (1-62)-Y33W           | 6926.5    | 6926.2   | -0.3                 |
| BovIF <sub>1</sub> (1-62)-Y33W-H49K      | 6917.6    | 6917.1   | -0.5                 |
| HumIF <sub>1</sub> (1-81)-wild-type      | 9516.6    | 9516.3   | -0.3                 |
| HumIF <sub>1</sub> (1-81)-Y33W           | 9539.6    | 9539.5   | -0.1                 |
| HumIF <sub>1</sub> (1-81)-H49K           | 9507.6    | 9506.9   | -0.7                 |
| HumIF <sub>1</sub> (1-81)-Y33W-H49K      | 9530.6    | 9530.1   | -0.5                 |
| HumIF <sub>1</sub> (1-81)-S14D-Y33W      | 9567.6    | 9566.9   | -0.7                 |
| HumIF <sub>1</sub> (1-81)-S14D-Y33W-H49K | 9558.6    | 9558.5   | -0.1                 |
| HumIF <sub>1</sub> (1-81)-S14E-Y33W      | 9581.6    | 9581.6   | 0                    |
| HumIF <sub>1</sub> (1-81)-S14E-Y33W-H49K | 9572.7    | 9572.2   | -0.5                 |

**Table S5. Reference tryptic peptides for subunits of bovine ATP synthase**

| Subunit  | Sequence (residue numbers)         | Mass       |                |
|----------|------------------------------------|------------|----------------|
|          |                                    | Unlabelled | Heavy Labelled |
| $\alpha$ | AVDSLVPPIGR (152-161) <sup>1</sup> | 1025.5869  | 1032.6041      |
| OSCP     | YATALYSAASK (18-28) <sup>1</sup>   | 1144.5764  | 1151.5936      |
| e        | ELAEAQEDTILK (59-70) <sup>1</sup>  | 1358.6929  | 1365.7101      |

<sup>1</sup>With <sup>13</sup>C and <sup>15</sup>N at leucine residues 156, 22 and 69, respectively.

**Table S6. Determination of subunit abundance and ratio data**

| Sequence     | Labelled peptide |            | Endogenous peptide |             |        | Subunit ratio | F <sub>1</sub> F <sub>0</sub> nmol/mg |
|--------------|------------------|------------|--------------------|-------------|--------|---------------|---------------------------------------|
|              | MH <sup>2+</sup> | Area       | MH <sup>2+</sup>   | Area        | fmol   |               |                                       |
| AVDSLVPPIGR  | 517.3093         | 2550550439 | 513.8007           | 21750821234 | 1731.2 | 3.00          | 0.451                                 |
| YATALYSAASK  | 576.8041         | 5329160543 | 573.2955           | 13880112315 | 528.7  | 0.92          | 0.413                                 |
| ELAEAQEDTILK | 683.8623         | 2921375675 | 680.3537           | 10941705354 | 760.3  | 1.32          | 0.594                                 |

The Table contains a representative example of data obtained from an LC-MSMS analysis of a tryptic digest of SMPs (1.28  $\mu$ g), spiked with heavy labelled subunit specific peptides (203 fmol; see Table S5). Peak area ratios were obtained from the extracted ion chromatograms of the co-eluting peaks for the subunit specific peptides (charge state 2<sup>+</sup>) and the amount of endogenous peptide was calculated from the known quantity of labelled peptide. The subunit ratio was calculated based on the presence of three  $\alpha$ -subunits in each enzyme complex.



## References

1. Bason, J. V., Montgomery, M. G., Leslie, A. G. W. and Walker, J. E. (2014) Pathway of binding of the intrinsically disordered mitochondrial inhibitor protein to F<sub>1</sub>-ATPase. *Proc. Natl. Acad. Sci. U S A* **111**, 11305-11310
2. Di Pancrazio, F., Mavelli, I., Isola, M., Losano, G., Pagliaro, P., Harris, D. A. and Lippe, G. (2004) In vitro and in vivo studies of F<sub>0</sub>F<sub>1</sub> ATP synthase regulation by inhibitor protein IF<sub>1</sub> in goat heart. *Biochim. Biophys. Acta* **1659**, 52-62
3. Esparza-Moltó, P. B., Nuevo-Tapióles, C., Chamorro, M., Nájera, L., Torresano, L., Santacatterina, F. and Cuezva, J. M. (2019) Tissue-specific expression and post-transcriptional regulation of the ATPase inhibitory factor 1 (IF1) in human and mouse tissues. *FASEB J.* **33**, 1836-1851
